# Supplementary material
Source: PubMed Central journal article supplement (PMC6647954)
Supplement: ao8b03137_si_001.pdf [file ao8b03137_si_001.pdf]

# Supporting Information

*For*

## **Bacteria-Responsive Single and Core–Shell Nanofibrous Membranes Based on Polycaprolactone/Poly(ethylene succinate) for On-Demand Release of Biocides**

Zahra Abdali<sup>1</sup>, Sarvesh Logsetty<sup>2</sup>, and Song Liu<sup>1, 3, 4,\*</sup>

1. Biomedical Engineering, Faculty of Engineering, University of Manitoba;
2. Director of Manitoba Firefighters Burn Unit, Professor in the Departments of Surgery and Psychiatry, Rady Faculty of Health Sciences, University of Manitoba;
3. Department of Biosystems Engineering, University of Manitoba.
4. Department of Medical Microbiology, University of Manitoba.

\* Corresponding author: [Song.Liu@umanitoba.ca](mailto:Song.Liu@umanitoba.ca); E2-376 EITC Bldg, 75A Chancellor's Circle, Winnipeg, MB, Canada, R3T 2N2.

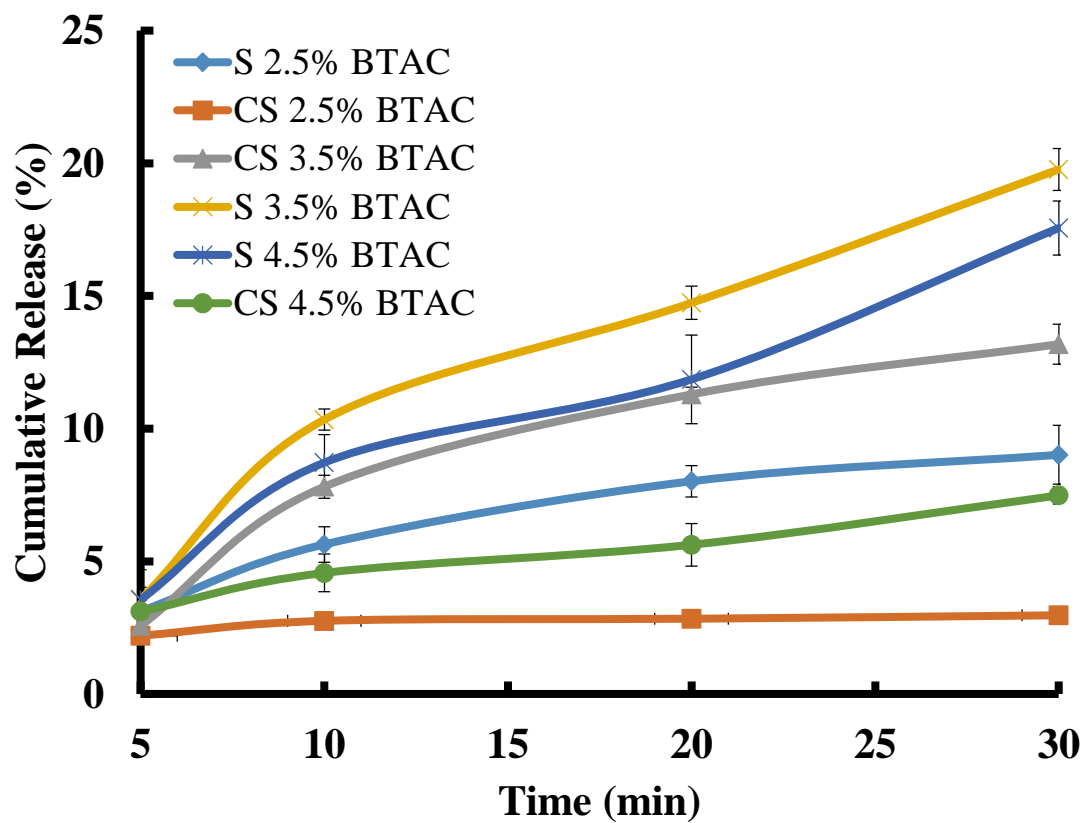

**Figure S1.** Cumulative release of BTAC from the single and core-shell nanofibers in Tryptone Soya Broth (TSB)
